# Supplementary material for: Development and optimisation of a SiO2 PVD technique based on the thermal decomposition of PDMS
Source: Royal Society of Chemistry journal article supplement (doi:10.1039/d2nj05886c), 2023-01-01
Supplement: d2nj05886c1.pdf [file d2nj05886c1.pdf]

## Supplementary Information

### Development and optimisation of a SiO<sub>2</sub> PVD technique based on the thermal decomposition of PDMS

*Paul Cannon <sup>a\*</sup>, Enda McGlynn <sup>a,b</sup>, Brian Freeland <sup>c</sup>, and Jennifer Gaughran <sup>a</sup>*

<sup>a</sup> School of Physical Sciences, Dublin City University, Dublin 9, Ireland,

<sup>b</sup> National Centre for Plasma Science and Technology, Dublin City University, Dublin 9, Ireland, and

<sup>3</sup> School of Biotechnology, Dublin City University, Dublin 9, Ireland

E-mail-address: [paul.cannon3@mail.dcu.ie](mailto:paul.cannon3@mail.dcu.ie) (P. Cannon)

**Supplementary information consists of 8 pages, including this page.**

There are 7 Figures.

#### **List of Figures**

**Figure S1:** Raw data of Figure 3 of the manuscript.

**Figure S2:** Raw data of Figure 6 of the manuscript.

**Figure S3:** Raw data of Figure 7 of the manuscript.

**Figure S4:** Raw data of Figure 8 of the manuscript.

**Figure S5:** Raw data of Figure 9 of the manuscript.

**Figure S6:** Raw data of Figure 10 of the manuscript.

**Figure S7:** Raw data of Figure 11 of the manuscript.

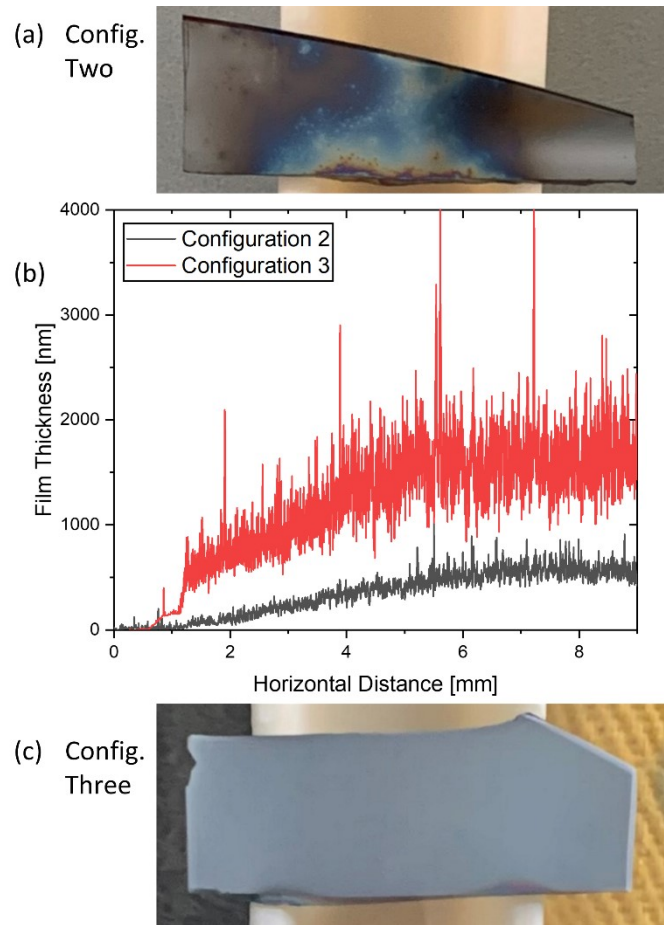

Figure S1: Raw data of Figure 3 of the manuscript.

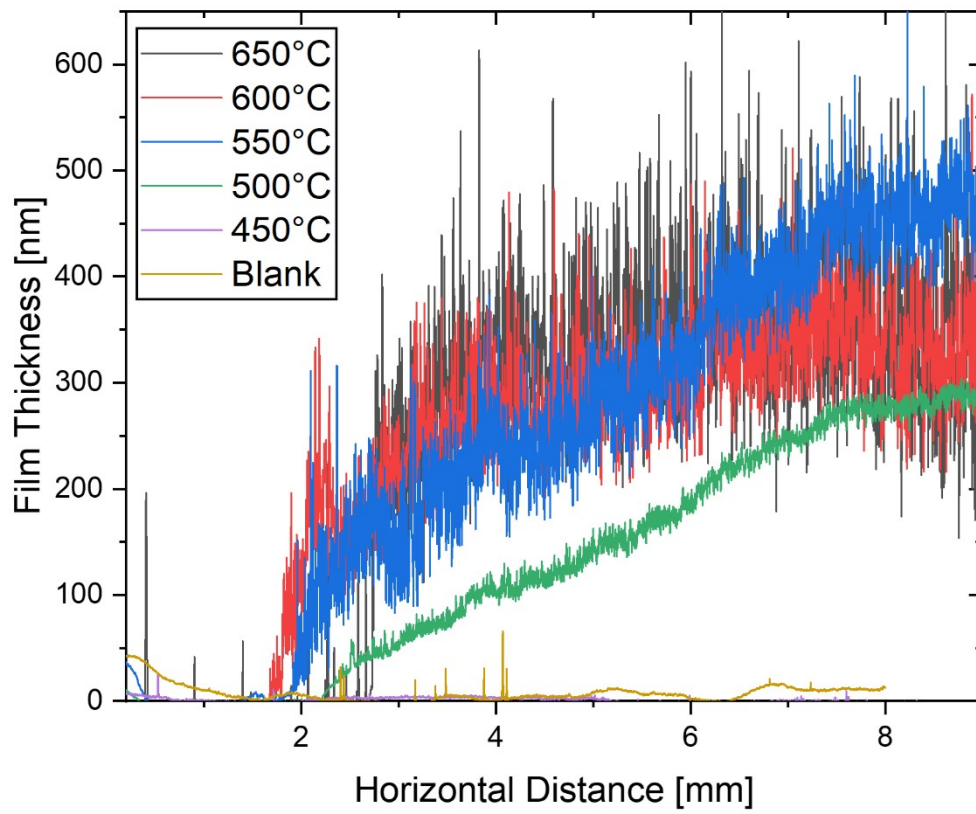

Figure S2: Raw data of Figure 6 of the manuscript.

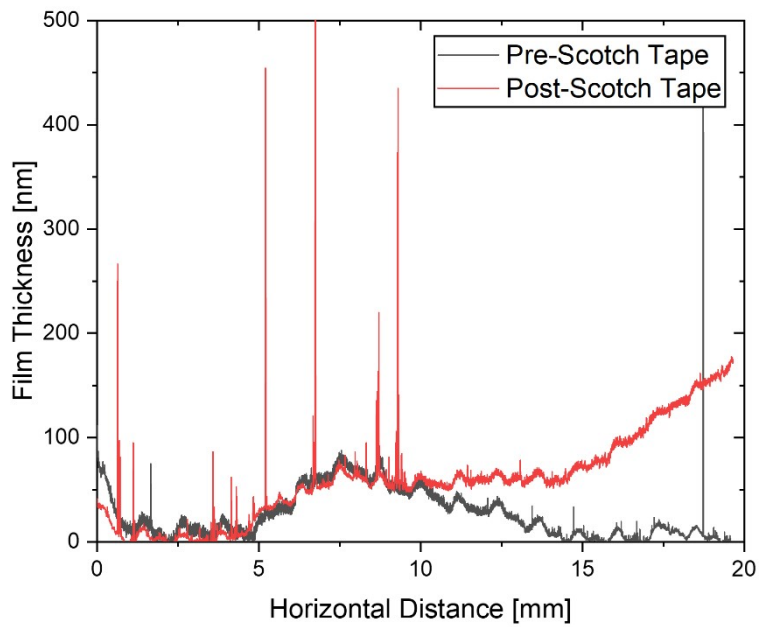

Figure S3: Raw data of Figure 7 of the manuscript.

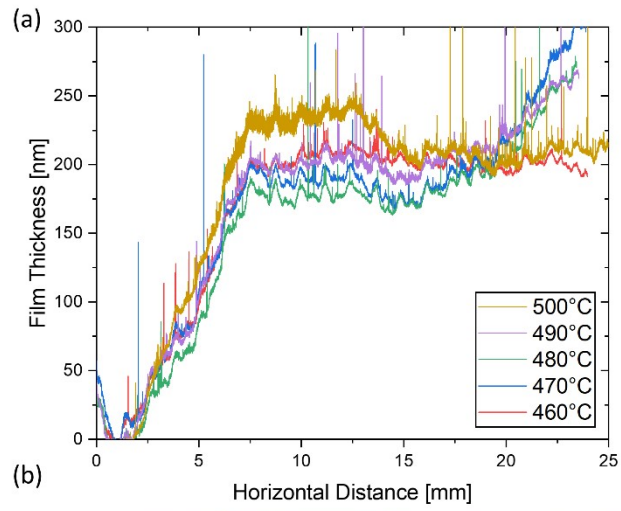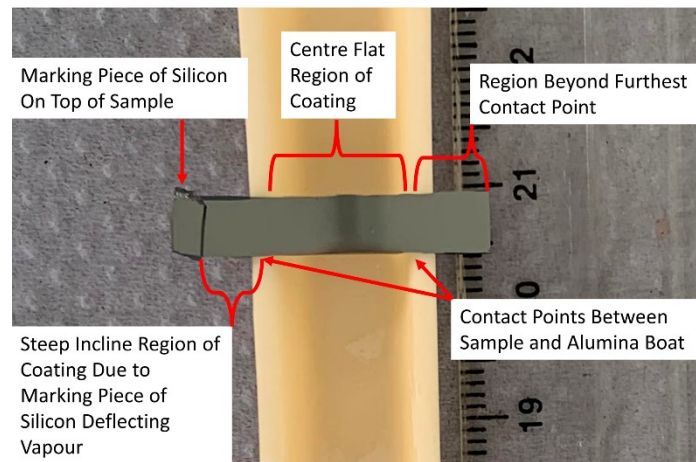

Figure S4: Raw data of Figure 8 of the manuscript.

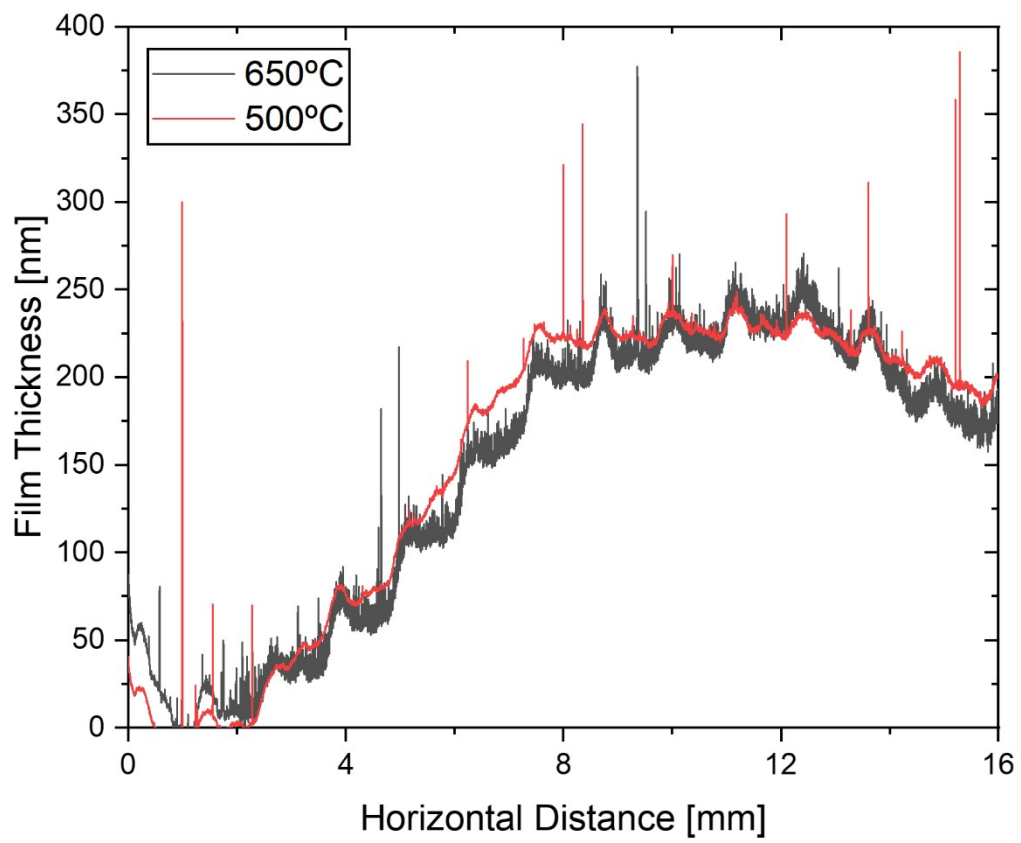

Figure S5: Raw data of Figure 9 of the manuscript.

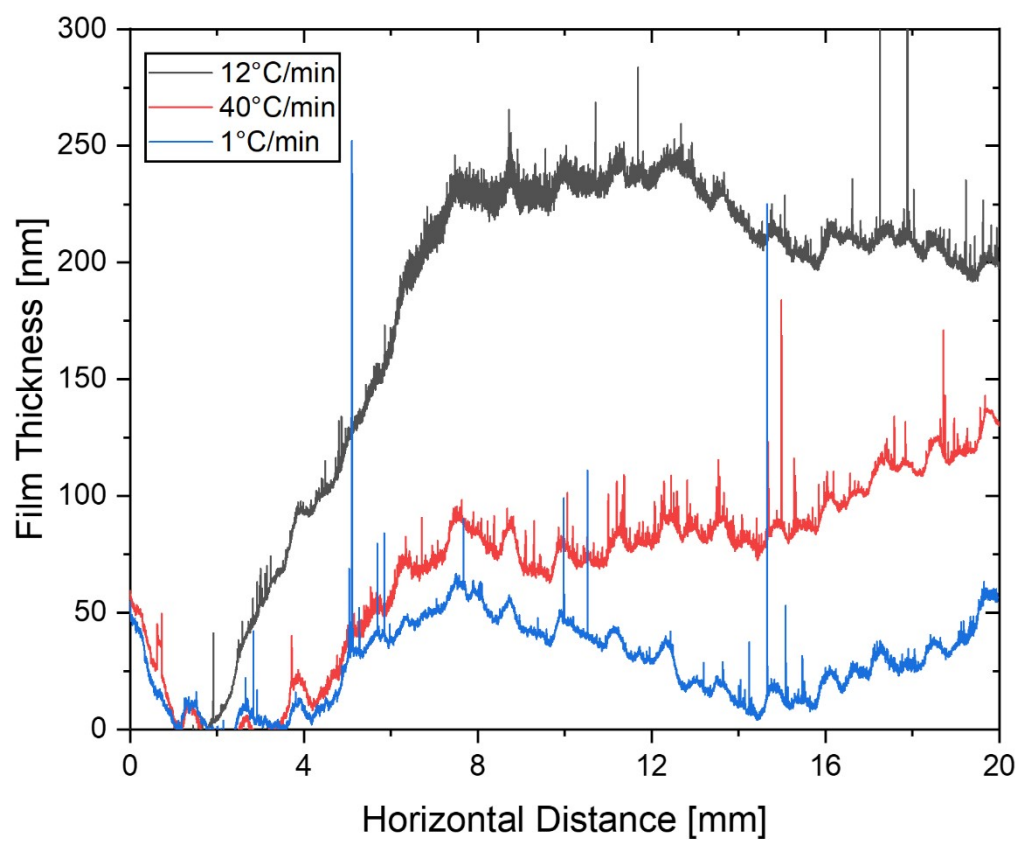

Figure S6: Raw data of Figure 10 of the manuscript.

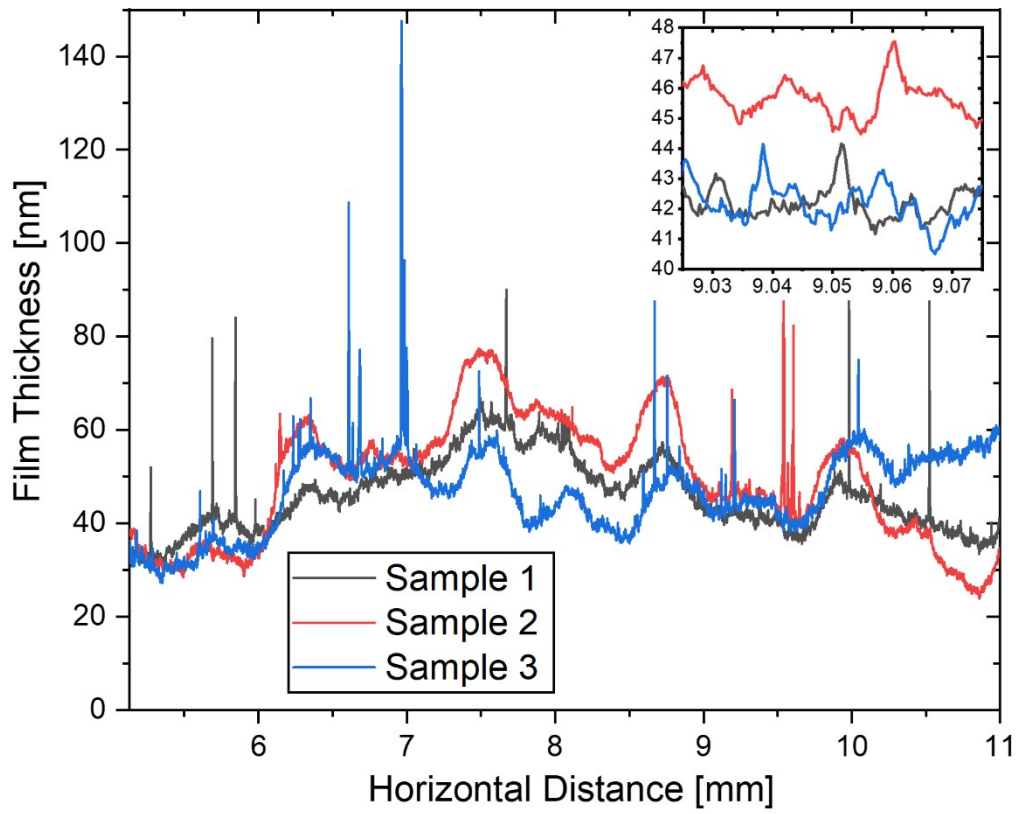

Figure S7: Raw data of Figure 11 of the manuscript.
